# Supplementary material for: Quality Characteristics and Antioxidant Activity of Fermented Symbiotic Beverages Supplemented with Eucheuma Cottonii
Source: Research Square preprint supplement (doi:10.21203/rs.3.rs-5554848/v1), 2025-04-11
Supplement: Supplementary file 1 [file d4df3852f12115d2cd9f396f.docx]

**Quality Characteristics and Antioxidant Activity of Fermented Symbiotic Beverages Supplemented with *Eucheuma Cottonii***

Muhammad Qasim Ali1, Mohd Akmal Azhar1, Mimi Sakinah Abdul Munaim1, Nur Fathin Ruslan1, Abdurahman Hamid Nour 1, Noormazlinah Ahmad*1, Abeer Essam Noman*2, Luay M Alsubhi3

*1Faculty of Chemical and Process Engineering Technology, University Malaysia Pahang, Al Sultan Abdullah, 26300 Gambang, Pahang, Malaysia.*

*2Department of Food Science and Nutrition, Faculty of Agriculture, Food and Environment, Sana’a University, Sana’a, Yemen*

*3Environment Health Laboratory for Food and Water, Jeddah Municipality, Jeddah, Saudi Arabia*

Standard curve for Total phenolic content, DPPH, Protein, and FRAP.


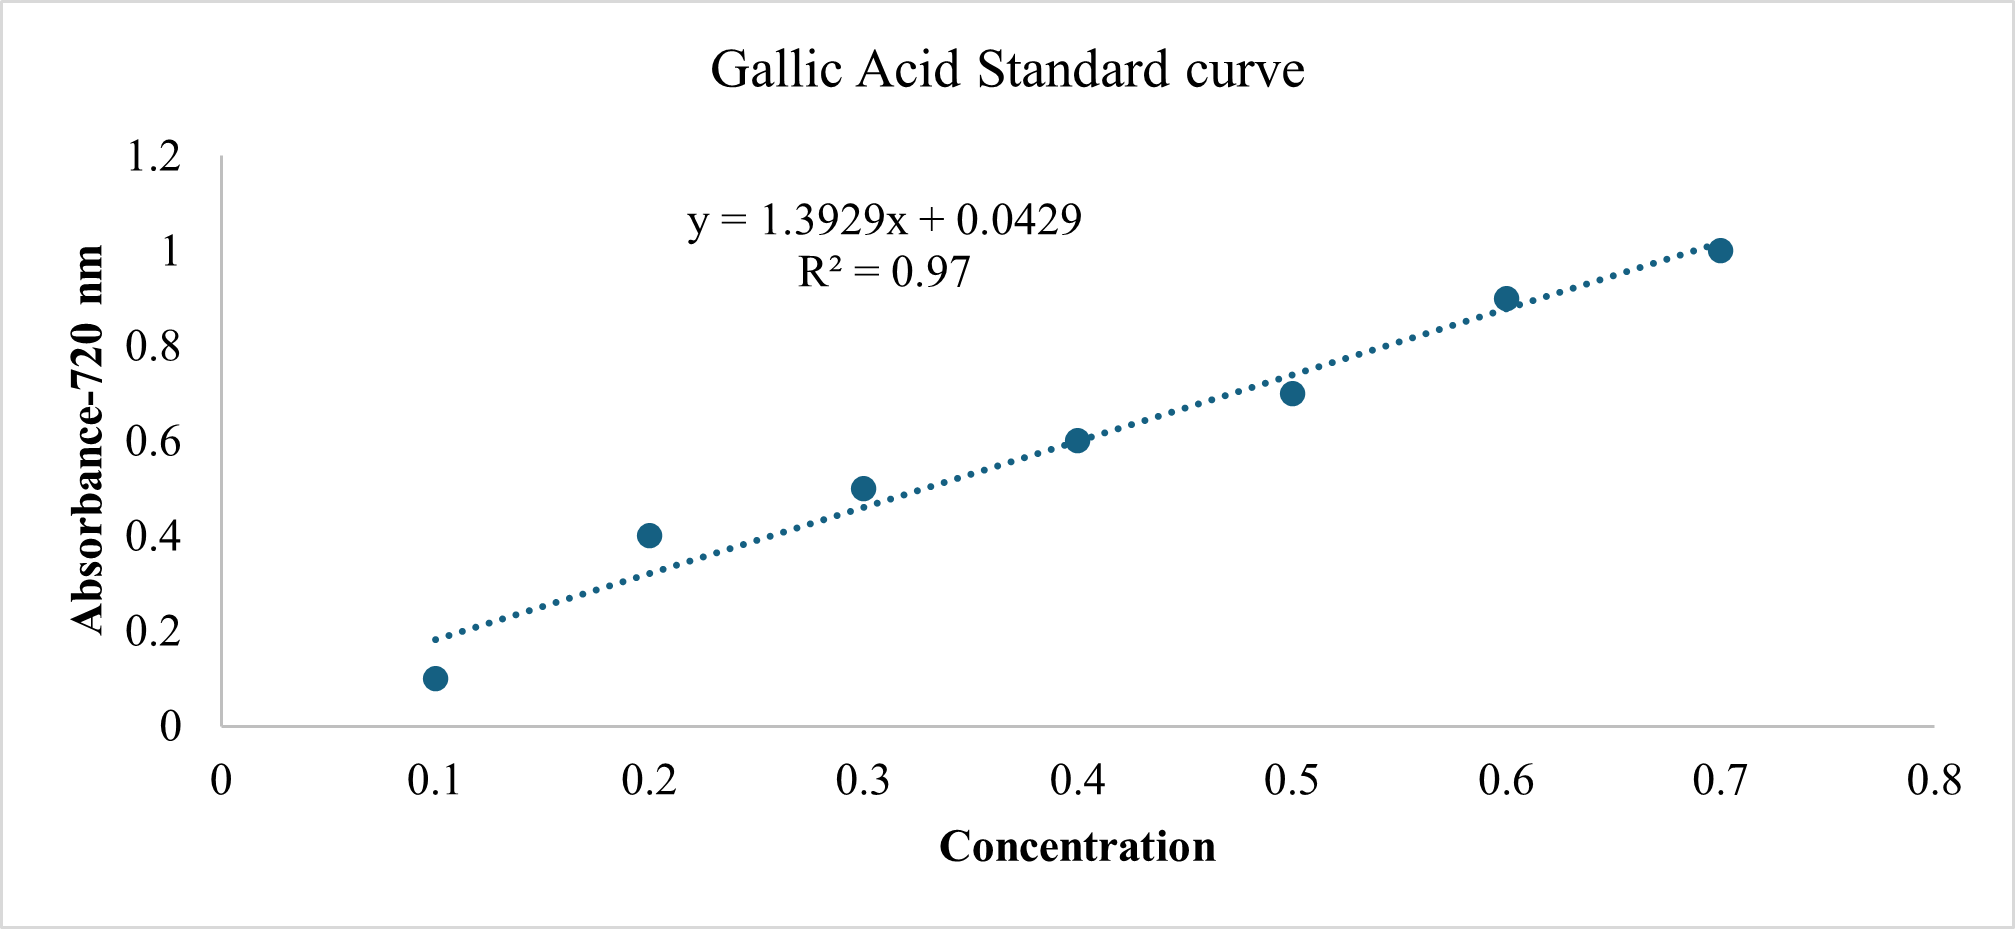


Figure S1. Standard curve for Total phenolic content


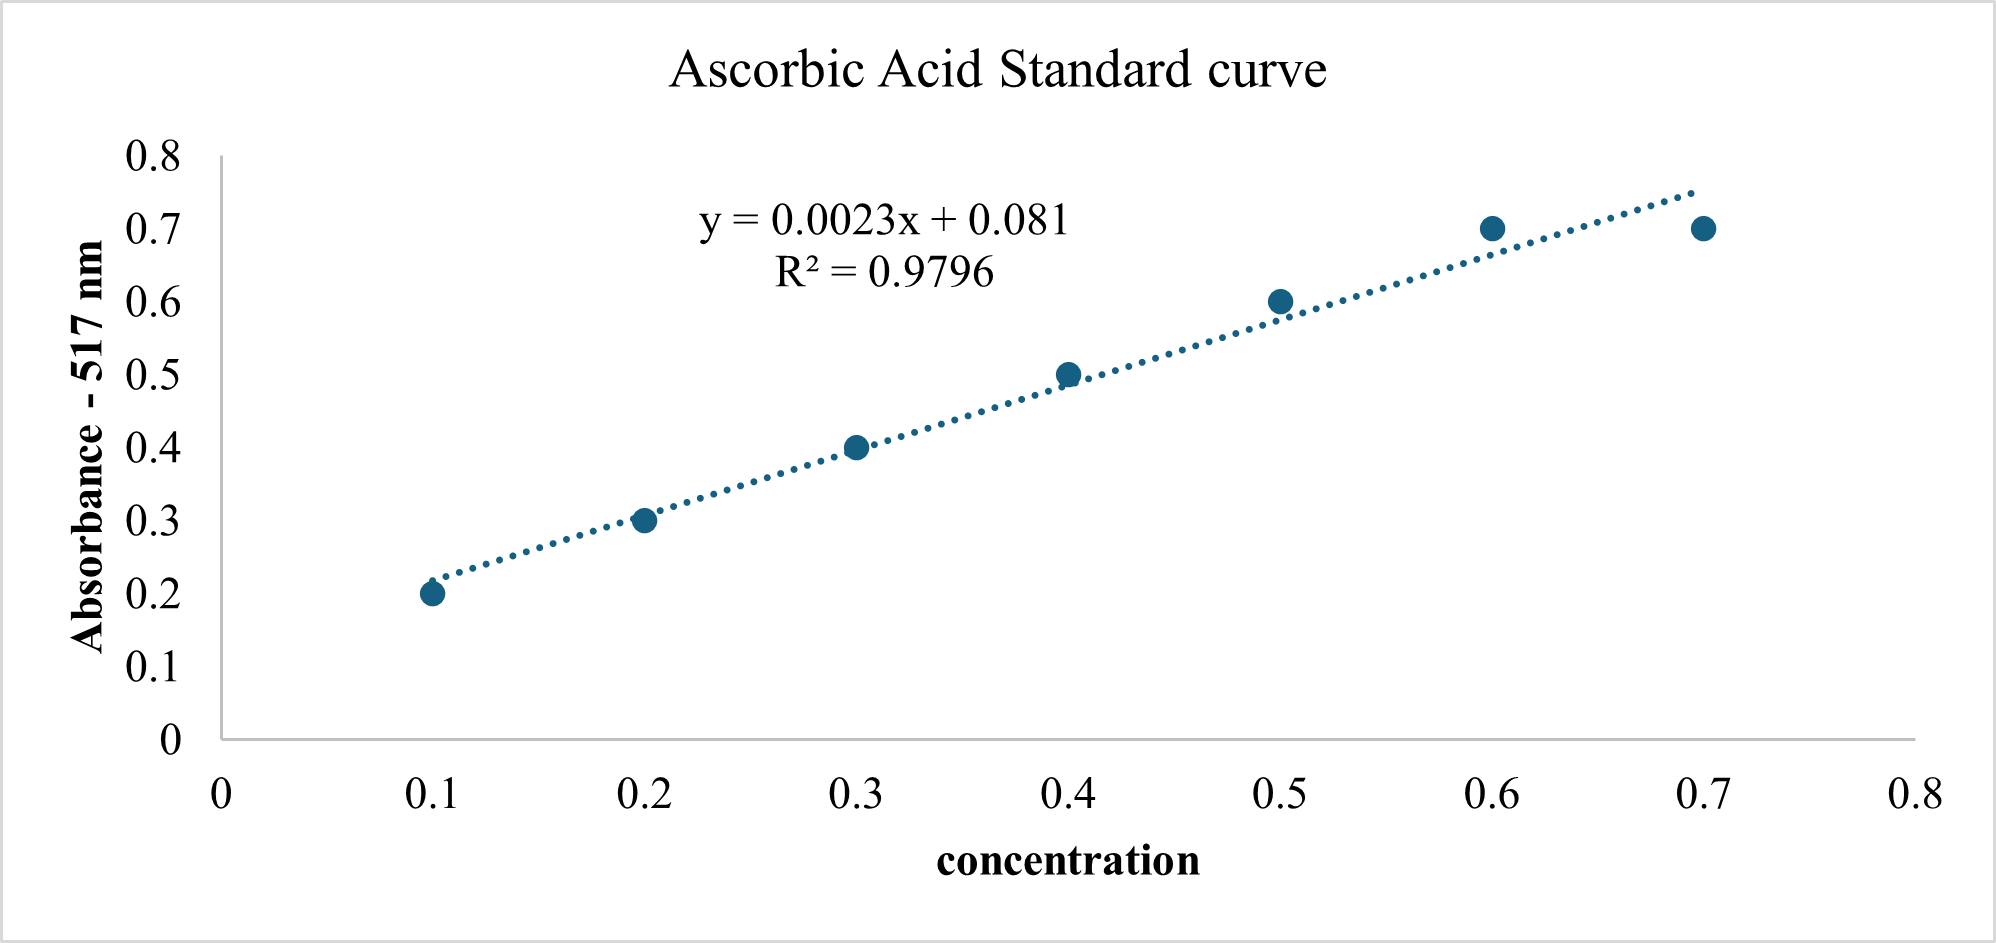


Figure S2. Standard curve for (DPPH) Radical Scavenging Activity


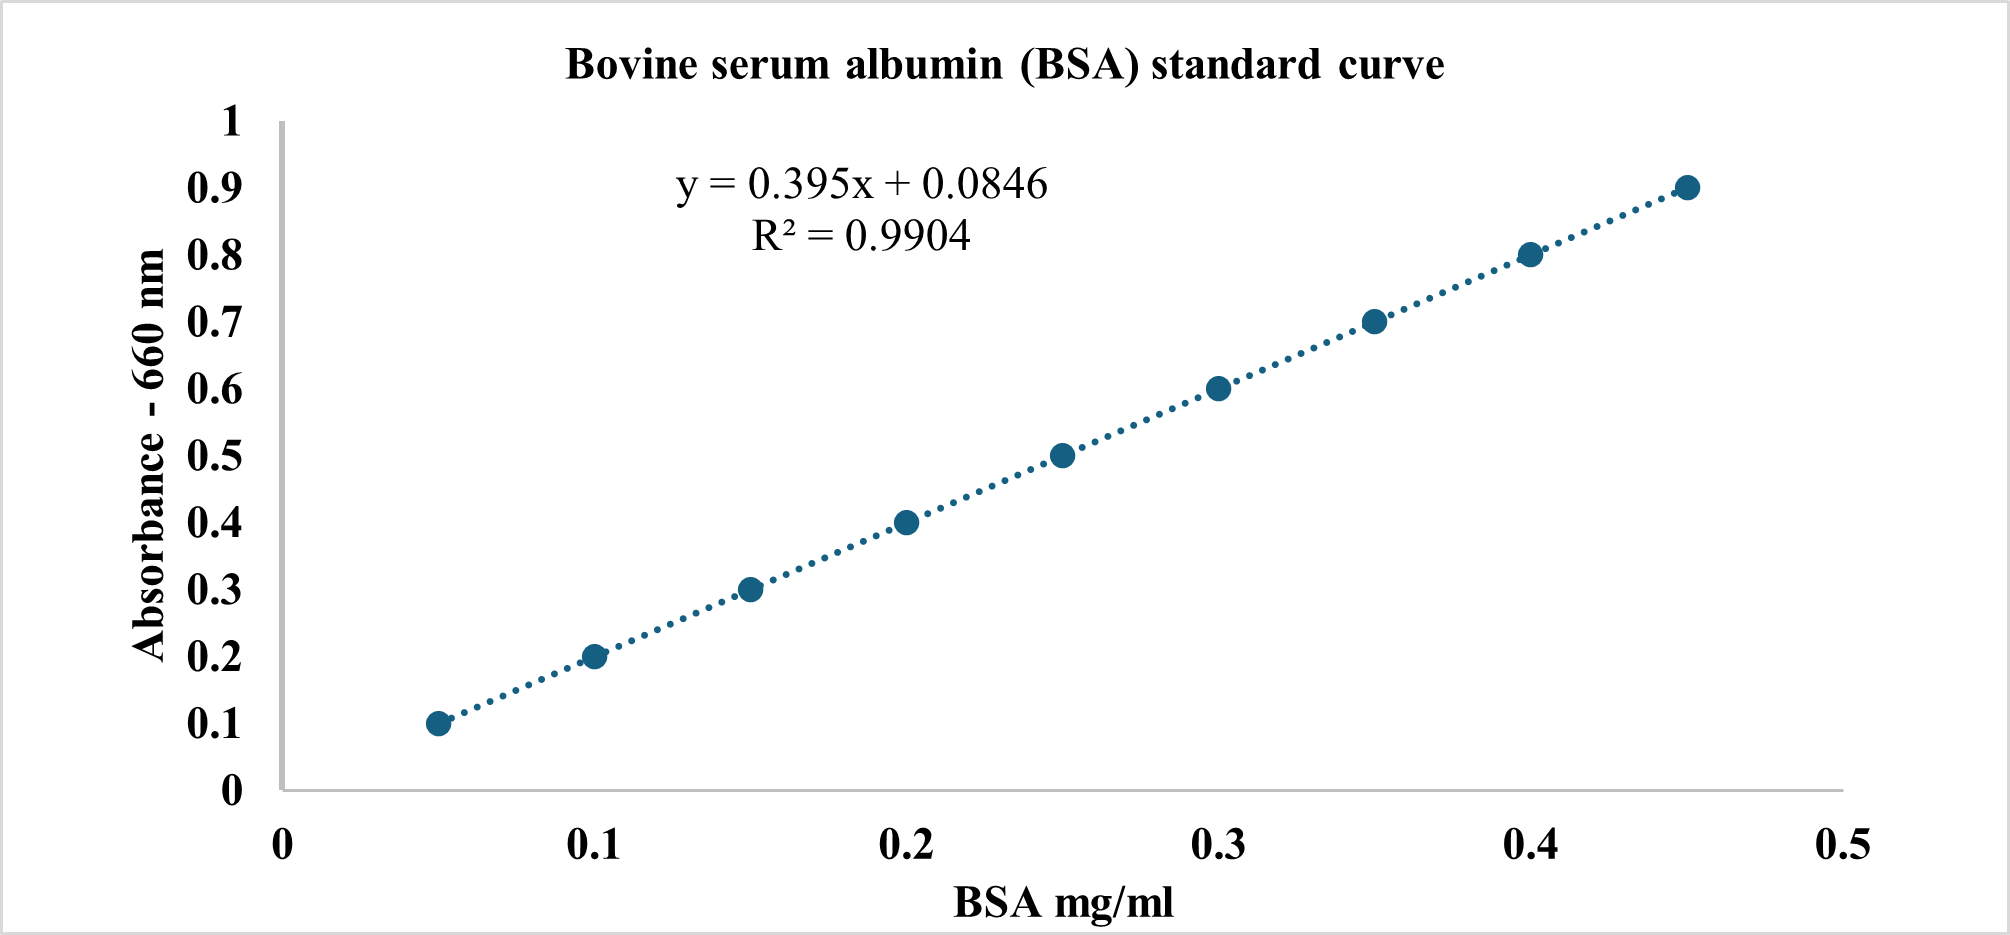


Figure S3. Standard curve for Bovine serum albumin


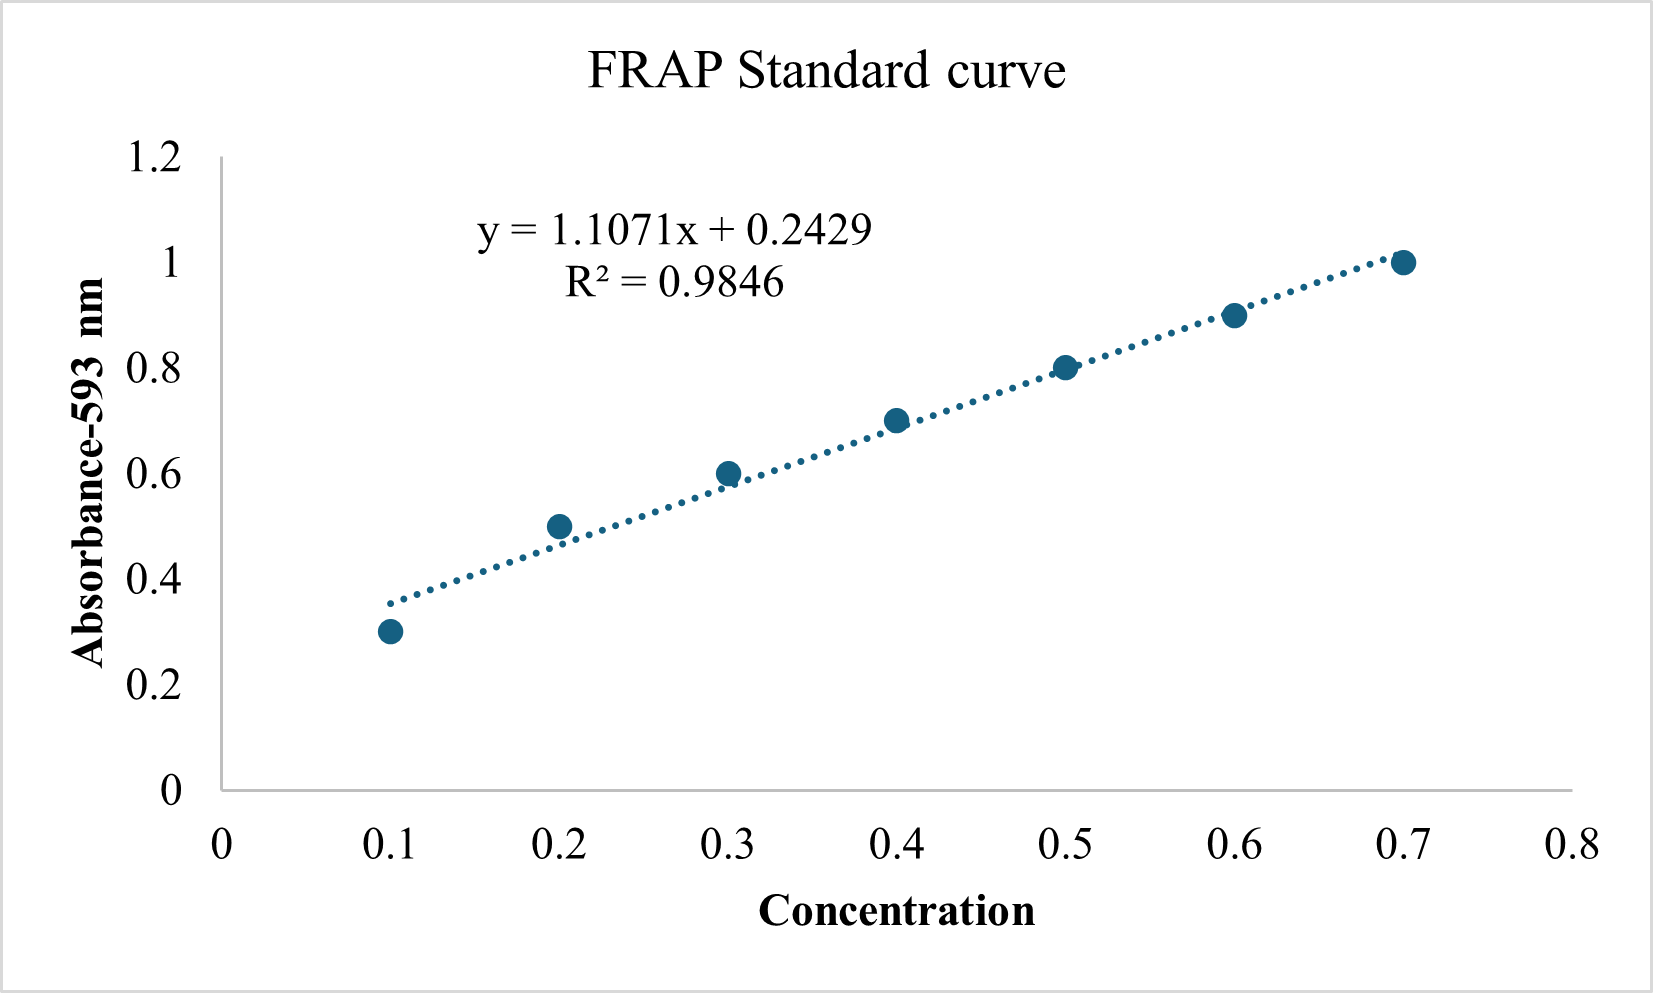


Figure S4. Standard curve for Ferric Reducing Antioxidant Power Assay

Table S1. Sensory evaluation Performa for sensory evaluation

| SENSORY EVALUATION *Research Title:* | | | | | | | | | | | | |
| --- | --- | --- | --- | --- | --- | --- | --- | --- | --- | --- | --- | --- |
| *Research Student:* | | | | | | | | | | | | |
| *Research Supervisor:* | | | | | | | | | | | | |
|  | | | | | | | | | | | | |
| *Name of Judge: ____________________________________________________________* | | | | | | | | | | | | *Dated: ______* |
|  | | | | | | |  | | | | | |
|  | | | | | | | | | | | | |
| 9 - POINT HEDONIC SCALE | | | | | | | | | | | | |
| Score | **Remarks** | | | **Score** | **Remarks** | | | | | **Score** | **Remarks** | |
| 1 | Dislike Extremely | | | **4** | Dislike Slightly | | | | | **7** | Like Moderately | |
| 2 | Dislike Very Much | | | **5** | Neither Dislikes nor Like | | | | | **8** | Like Very Much | |
| 3 | Dislike Moderately | | | **6** | Likes Slightly | | | | | **9** | Like Extremely | |
|  |  | | |  |  | | | | |  |  | |
| Evaluation (SCORES) BY THE JUDGE | | | | | | | | | | | | |
| Sample No | | **Color** | **Flavor** | | | **Taste** | | **Appearances** | **Overall Acceptability** | | | |
| Sample 1 | |  |  | | |  | |  |  | | | |
| Sample 2 | |  |  | | |  | |  |  | | | |
| Sample 3 | |  |  | | |  | |  |  | | | |
| Sample 4 | |  |  | | |  | |  |  | | | |
| Sample 5 | |  |  | | |  | |  |  | | | |
|  | |  |  | | |  | |  |  | | | |
| Remarks for Improvement *(Highly valuable and appreciated by us)*: | | | | | | | | | | | | |
| *Instructions for Judges*   - Chew the sample of the sweet and score it. - Before preceding the next sample, rinse your mouth with water. - Make an intercomparison of the sample and record the score. | | | | | | | | | | | | |
| *Ref:*  Meilgaard M C, G V. Civille and BT. Carr. 2007. Sensory Evaluation Techniques. 4th Edition. C.R.C. Press L.L.C., New York, USA. | | | | | | | | | | | | |
